# Supplementary material for: Community Perceptions of a Multilevel Sanitation Behavior Change Intervention in Rural Odisha, India
Source: PubMed Central journal article supplement (PMC7345262; doi:10.3390/ijerph17124472), 2020-06-22
Supplement: ijerph-17-04472-s001.pdf [file ijerph-17-04472-s001.pdf]

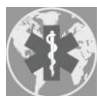

1 Article

## 2 **Community perceptions of a multi-level sanitation** 3 **behavior change intervention in rural Odisha, India**

4 **Renee De Shay<sup>1</sup>, Dawn L. Comeau<sup>1</sup>, Gloria D. Sclar<sup>2</sup>, Parimita Routray<sup>3</sup>, Bethany A. Caruso<sup>\*2,4</sup>**

5 <sup>1</sup> Department of Behavioral, Social, & Health Education Sciences, Rollins School of Public Health, Emory  
6 University, Atlanta, GA 30322, USA; [reeneedeshay@gmail.com](mailto:reeneedeshay@gmail.com); [dcomeau@emory.edu](mailto:dcomeau@emory.edu)

7 <sup>2</sup> Gangarosa Department of Environmental Health, Rollins School of Public Health, Emory University,  
8 Atlanta, GA 30322, USA; [gloria.sclar@emory.edu](mailto:gloria.sclar@emory.edu); [bethany.caruso@emory.edu](mailto:bethany.caruso@emory.edu)

9 <sup>3</sup> Independent Consultant, Bhubaneswar, Odisha, India; [rparimita@gmail.com](mailto:rparimita@gmail.com)

10 <sup>4</sup> Hubert Department of Global Health; Rollins School of Public Health, Emory University, Atlanta, GA  
11 30322, USA

12 \* Correspondence: [bethany.caruso@emory.edu](mailto:bethany.caruso@emory.edu)

13 Received: date; Accepted: date; Published: date

14 **Abstract:** While latrine coverage is increasing in India, not all household members use their latrines.  
15 Cost-effective, culturally appropriate, and theory-informed behavior change interventions are  
16 necessary to encourage sustained latrine use by all household members. We qualitatively examined  
17 community perceptions of sanitation interventions broadly, along with specific impressions and  
18 spillover of community-level activities of the Sundara Grama latrine use behavior change  
19 intervention in rural Odisha, India. We conducted sixteen sex-segregated focus group discussions  
20 (n=152) in three intervention and three non-intervention villages and thematically analyzed the  
21 data. We found Sundara Grama was well-received by community members and considered  
22 educative, but perceptions of impact on latrine use were mixed and varied by activity. Intervention  
23 recruitment challenges prevented some, such as women and households belonging to lower castes,  
24 from attending activities. Spillover occurred in one of two non-intervention villages, potentially due  
25 to positive relations within and between the non-intervention village and nearby intervention  
26 village. Community-level sanitation initiatives can be hindered by community divisions,  
27 prioritization of household sanitation over community cleanliness, and perceptions of latrine use as  
28 a household and individual issue, rather than common good. Community-centered sanitation  
29 interventions should assess underlying social divisions, norms, and perceptions of collective  
30 efficacy to adapt intervention delivery and activities.

31 **Keywords:** WASH, qualitative research, latrine use, process evaluation, gender, collective efficacy

32

33

34

**Table S1.** Descriptions of Sundara Grama Behavior Change Activities

| <b>Activity</b>               | <b>Level of Change</b> | <b>Aim and Description</b>                                                                                                                                                   |
|-------------------------------|------------------------|------------------------------------------------------------------------------------------------------------------------------------------------------------------------------|
| <i>Assessed in this study</i> |                        |                                                                                                                                                                              |
| <i>Palla</i>                  | Community              | To educate and engage community members on the health and non-health benefits to latrine use through a traditional folk theater performance                                  |
| Transect walk                 | Community              | To encourage community members to re-evaluate village cleanliness by marking feces with colored powder during an early morning walk through village and defecation fields.   |
| Community meeting             | Community              | To facilitate community motivation, action, and commitment toward achieving sanitation through an interactive meeting with creation of a community action plan.              |
| <i>Other activities</i>       |                        |                                                                                                                                                                              |
| Mother's meeting              | Group                  | To provide mothers with practical knowledge on the materials and practices used to safely dispose of infant and young children's feces into latrine.                         |
| Household visits              | Household              | To reiterate and reflect on intervention messages and facilitate household commitment toward achieving sanitation, with distribution of a reminder poster.                   |
| Community wall painting*      | Community              | To publicly display the community-identified goals and action steps for sanitation alongside a painted community map in order to track progress towards the community goals. |
| Latrine repairs*              | Household              | To make minor repairs to household latrines so they are functional, safe and usable.                                                                                         |

35

\*Not completed at the time of this study.

36

37 **Table S2.** Process Evaluation Elements in FGD Guides as Informed by Sanders et al (2005) [43]

| <b>Element</b>                                              | <b>Definition from Saunders<sup>1</sup></b>                                                                                                                                                         | <b>Example FGD Questions</b>                                                                                                                                                                                         |
|-------------------------------------------------------------|-----------------------------------------------------------------------------------------------------------------------------------------------------------------------------------------------------|----------------------------------------------------------------------------------------------------------------------------------------------------------------------------------------------------------------------|
| <i>Intervention and Non-intervention Village FGD Guides</i> |                                                                                                                                                                                                     |                                                                                                                                                                                                                      |
| Satisfaction                                                | “Participant (primary and secondary audiences) satisfaction with program, interactions with staff and/or investigators.”                                                                            | What did you think of [activity name]? How did it make you feel?                                                                                                                                                     |
| Reach                                                       | “Proportion of the intended priority audience that participates in the intervention; often measured by attendance; includes documentation of barriers to participation”                             | Who attended [the activity]? Probe for age, caste, and gender.<br><br>If you were unable to attend or left early, why?                                                                                               |
| Recruitment                                                 | “Procedures used to approach and attract participants at individual or organizational levels; includes maintenance of participant involvement in intervention and measurement components of study.” | How did you find out about [activity name]?                                                                                                                                                                          |
| <i>Non-intervention Village FGD Guide</i>                   |                                                                                                                                                                                                     |                                                                                                                                                                                                                      |
| Context                                                     | “Aspects of the environment that may influence intervention implementation or study outcomes; includes contamination or the extent to which the control group was exposed to the program.”          | Have there ever been sanitation promotion events in this village?<br>Do you think these events were good, why or why not?<br><br>Have you heard about the recent sanitation events in [paired intervention village]? |

38 1. (p. 139)

39

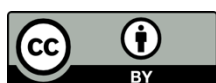

© 2020 by the authors. Submitted for possible open access publication under the terms and conditions of the Creative Commons Attribution (CC BY) license (<http://creativecommons.org/licenses/by/4.0/>).

40
